# Supplementary material
Source: publisher figshare collection journal article supplement (https://tandf.figshare.com/ndownloader/files/18100070)
Supplement: Supplementary file 1 [file 18100070]

**Supplementary Table 1** Primers and their PCR conditions implemented in this study

| Name | Accession Number | Primer Sequence (5' to 3') | PCR condition |
| --- | --- | --- | --- |
| *H+-ATPase* | NM_001247548.1 | **F:** CAACGTGAGCTTCAATGGGC  **R:**CGTTGCCTAGCGATTTCAGC | 95˚C (10 min) →[95˚C (15s) →59˚C (30s) ] x 40cycles→95˚C (15s) →60 ˚C(1min) →95 ˚C(15sec) |
| *CAT1* | NM_001247898.1 | **F:**AATCATAGCCACGCGACCAA  **R:** CTCGGGGTCCATTGTTTGGA | 95˚C (10 min) →[95˚C (15s) →58˚C (30s) ] x 40cycles→95˚C (15s) →60 ˚C(1min) →95 ˚C(15sec) |
| *SOD* | AF527880.1 | **F:**ATGCGGTGTGGTTGGTTTGA  **R:**TATTGGCAACCCGGAGAGGA | 95˚C (10 min) →[95˚C (15s) →58˚C (30s) ] x 40cycles→95˚C (15s) →60 ˚C(1min) →95 ˚C(15sec) |
| *Actin* | NM_001330119.1 | **F:**GGGACGTGAAAGAAAAGCTCG  **R:**GGAAACGCTCAGCACCAATG | 95˚C (10 min) →[95˚C (15s) →59.5˚C (30s) ] x 40cycles→95˚C (15s) →60 ˚C(1min) →95 ˚C(15sec) |
